# Supplementary material
Source: publisher figshare collection journal article supplement (https://frontiersin.figshare.com/ndownloader/files/18005828)
Supplement: Supplementary file [file 18005828]

# Supplementary Data

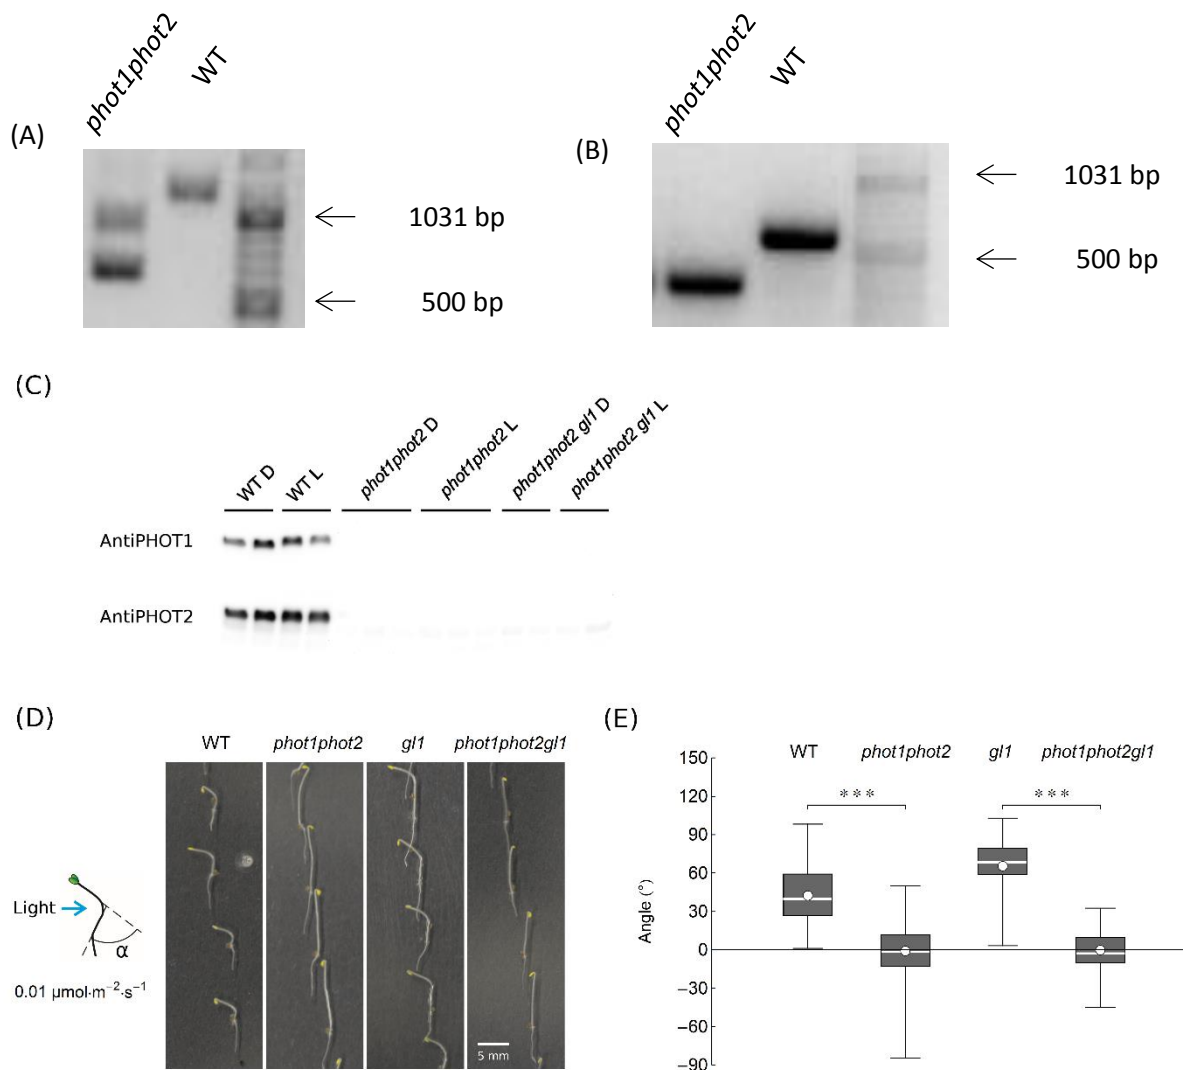

Supplementary Figure 1. Characterization of the *phot1phot2* double mutant selected from crosses. Confirmation of (A) the *phot1* mutation with: LP: 5'-TCGAACATTTCTTTGCAAATTC-3', RP: 5' - TCATCCAAAGATTCGCTCTTC - 3' and LBb1: 5'-ATTTTGCCGATTTCGGAAC - 3' primers. The predicted product size for WT: 1164 bp, the product size for the *PHOT1* (SALK\_088841) mutation: 540-840 bp (calculated by T-DNA Primer Design tool: <http://signal.salk.edu/tdnaprimers.2.html>), (B) the *phot2* mutation with: Phot2FOR: 5-GACGCTACACAGCCTCACTGTCCC- 3', Phot2REV: 5' - CAGATACCATCATATCGAATCAAG - 3' and LBb1: 5'-ATTTTGCCGATTTCGGAAC - 3' primers. The product size for the WT: 581 bp. DNA was separated in 1% agarose in TAE buffer and stained with Midori Green. (C) PHOT1 and PHOT2 protein levels in dark-adapted rosette leaves of *Arabidopsis* WT, the *phot1phot2* mutant used in this study and a *phot1phot2* mutant in the *glabra1* (*gl1*) background, either kept in darkness (D) or irradiated with white light (L) of 120  $\mu\text{mol}\cdot\text{m}^{-2}\cdot\text{s}^{-1}$  for 3 h. Protein extracts were analyzed by Western blotting with anti-PHOT1 (AS10 720) and anti-PHOT2 (AS10 721) antibodies obtained from Agrisera. (D) Examples of 3-day-old seedlings used for calculation of phototropic bending after 12 h-long treatment with unidirectional blue light of 0.01  $\mu\text{mol}\cdot\text{m}^{-2}\cdot\text{s}^{-1}$  (spectrum in the Supplementary Fig. 3B). Before the treatment, *Arabidopsis* WT, *glabra1* and phototropin double mutant seedlings were sown on MS agar plates, kept in 4°C for 2 days, irradiated with white light for 2 h and grown vertically in darkness for 3 days. The drawing shows how the bending angle of seedlings is defined. (E) The angle

of phototropic bending measured on 3-day-old etiolated seedlings after 12 h-long treatment with blue light of  $0.01 \mu\text{mol}\cdot\text{m}^{-2}\cdot\text{s}^{-1}$ . Asterisks indicate significant differences between the mutant and control lines (\*\*\*) - adjusted  $p < 0.001$ ). Each box represents measurements performed on 93-104 seedlings.

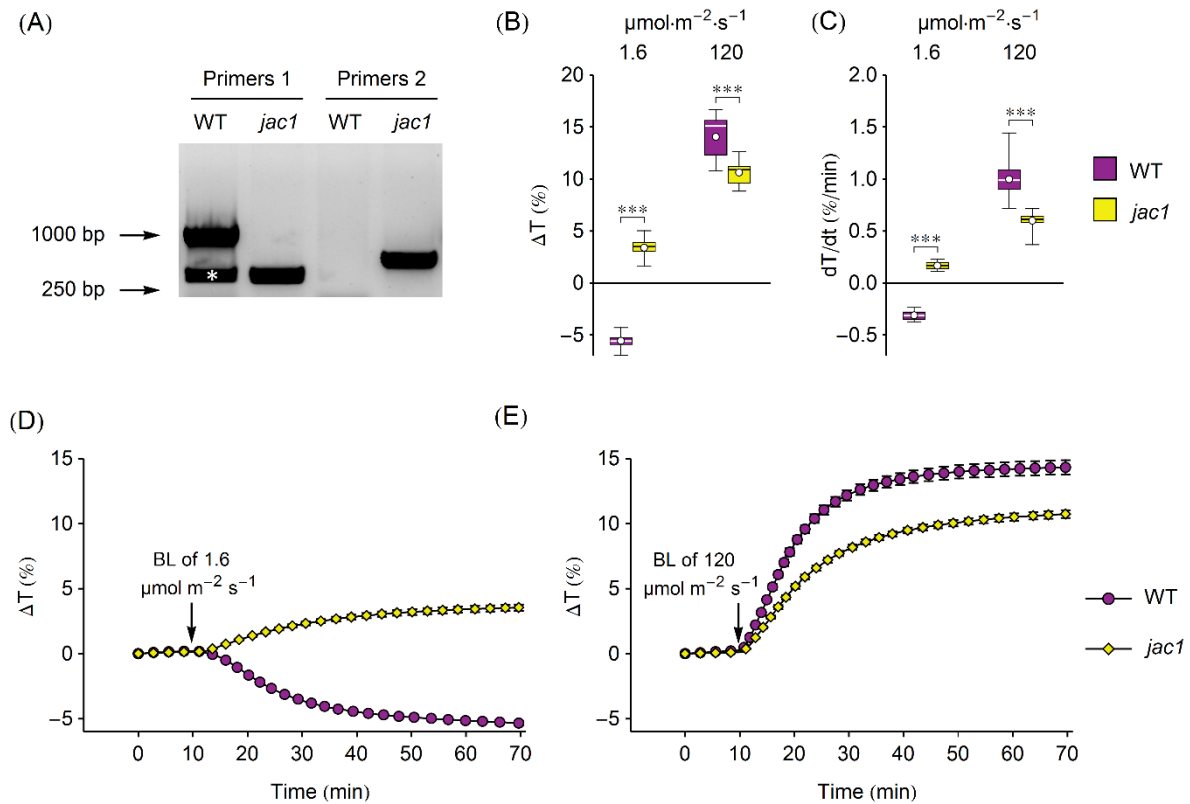

Supplementary Figure 2. Characterization of the *jac1* mutant. (A) Confirmation of *jac1-3* mutation (WiscDsLox457-460P9, insertion in the second exon of *AT1G75100*) with the primer pair 1: WiscDsLox457-460P9\_LP 5' - ACATGTCTGCAGAAACCAACC - 3' and WiscDsLox457-460P9\_RP 5' - GTGGACATCGATTTTGGTGAC - 3' or with the primer pair 2: LB\_WiscDsLox: 5'-AACGTCCGCAATGTGTTATTAAGTTGTC - 3' and WiscDsLox457-460P9\_RP 5' - GTGGACATCGATTTTGGTGAC - 3'. The predicted product size for WT: 1051 bp, the product size for the *jac1* mutation: 539-839 bp (calculated by T-DNA Primer Design tool: <http://signal.salk.edu/tdnaprimers.2.html>). DNA was separated in 0.8% agarose in TAE buffer and stained with ethidium bromide. The asterisk indicates a non-specific product for the genotyping primer pair. (B, C) Amplitudes  $\Delta T$  (B) and maximal rates  $dT/dt$  (C) of chloroplast responses to continuous blue light of 1.6 or 120  $\mu\text{mol}\cdot\text{m}^{-2}\cdot\text{s}^{-1}$  in leaves of dark-adapted plants. Each box represents measurements on 14 leaves. Asterisks indicate statistically significant differences between means for WT and *jac1* (\*\*\*) - adjusted  $p < 0.001$ ). (D, E) Averaged curves of changes in leaf transmittance  $T$  induced by blue light of (D) 1.6  $\mu\text{mol}\cdot\text{m}^{-2}\cdot\text{s}^{-1}$  and (E) 120  $\mu\text{mol}\cdot\text{m}^{-2}\cdot\text{s}^{-1}$  in WT and the *jac1-3* mutant obtained in this study. The curves used to calculate parameters presented in B and C. Arrows indicate the onset of blue light. Error bars represent SE.

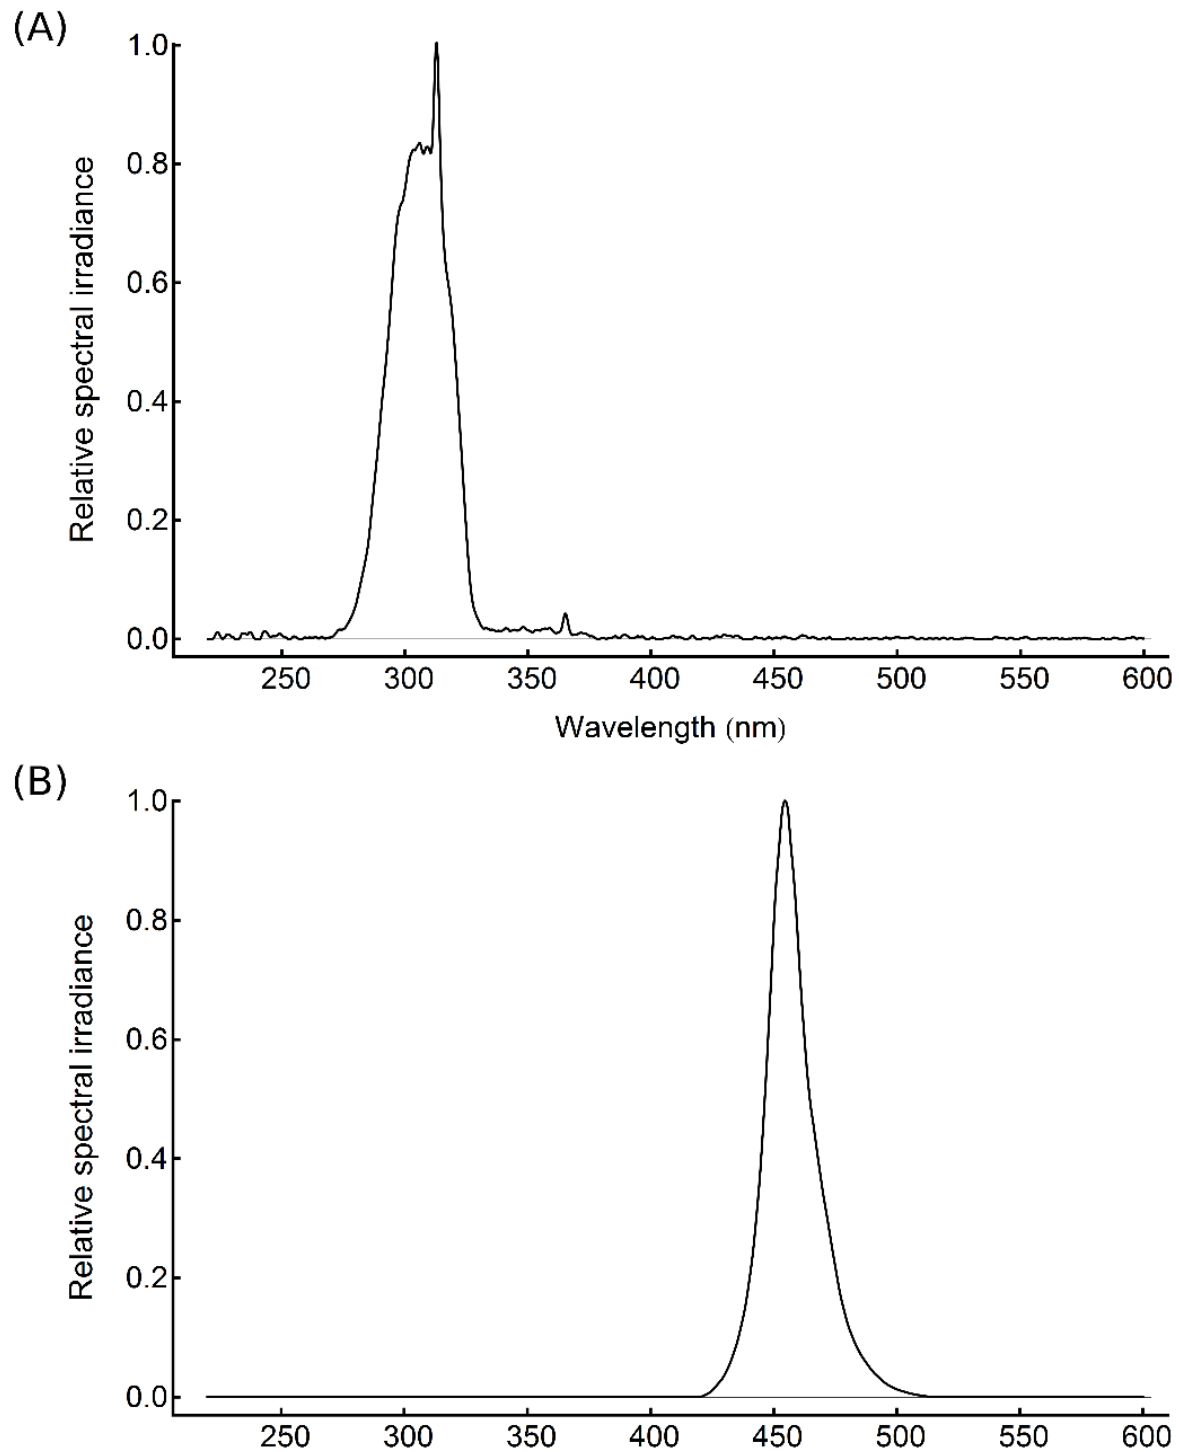

Supplementary Figure 3. Spectra of radiation used to induce chloroplast relocations. (A) Radiation emitted by USHIO UV-B G8T5E fluorescent tubes, filtered through UG-11 (Knight Optical, UK), ZUS0325 (Asahi Spectra Co, Japan) filters and two layers of cellulose acetate foil (95  $\mu\text{m}$  thick, Rachow Kunststoff-Folien, Germany). (B) Light emitted by blue LEDs (LXHL-PR09, Ledium Ltd., Hungary). The maxima of the spectra were set to 1. Spectra were measured with a Black Comet C spectrometer (Stellar Net, USA).

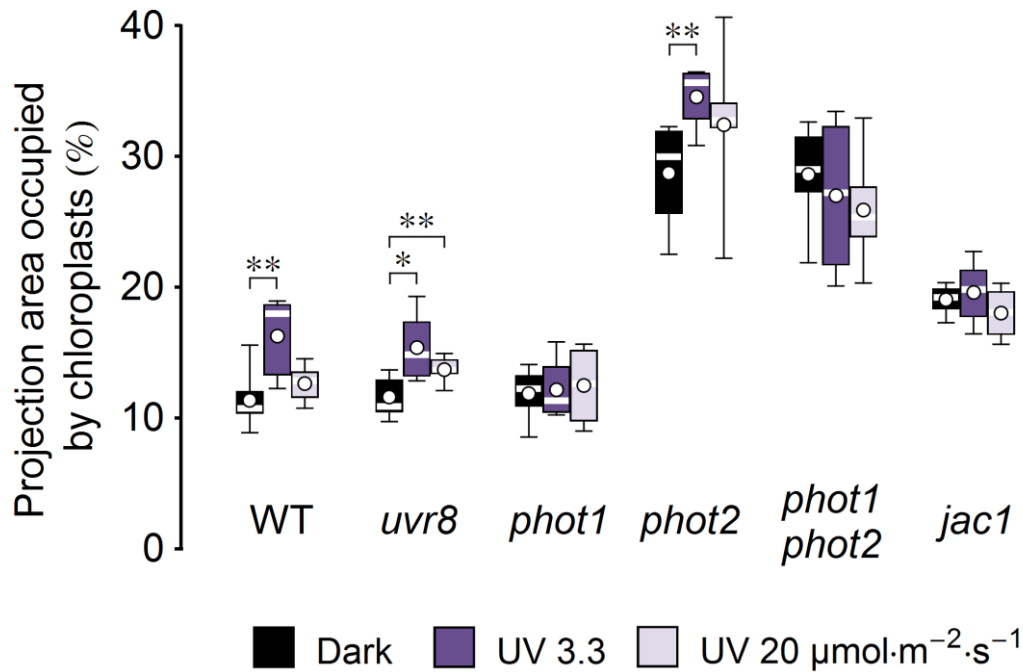

Supplementary Figure 4. Fraction of the area occupied by chloroplasts in projection images of palisade cells, recorded on *Arabidopsis* leaves of WT, *uvr8*, *phot1*, *jac1*, *phot2* and *phot1phot2* mutant plants. Leaves were irradiated for 1 h with UV-B (violet boxes) of 3.3  $\mu\text{mol}\cdot\text{m}^{-2}\cdot\text{s}^{-1}$  or 20  $\mu\text{mol}\cdot\text{m}^{-2}\cdot\text{s}^{-1}$  or kept in darkness (black boxes). Maximum intensity projections were calculated from Z-stacks, spanning 40  $\mu\text{m}$ , starting from the leaf upper surface. Each box represents measurements recorded from at least 4 leaves. Three stacks were recorded on every leaf and the mean value of the area calculated from three stacks was treated as a single measurement. Asterisks indicate statistically significant differences between means for WT and mutant lines (adjusted p values: \* -  $0.01 < p < 0.05$ , \*\* -  $0.001 < p < 0.01$ ).

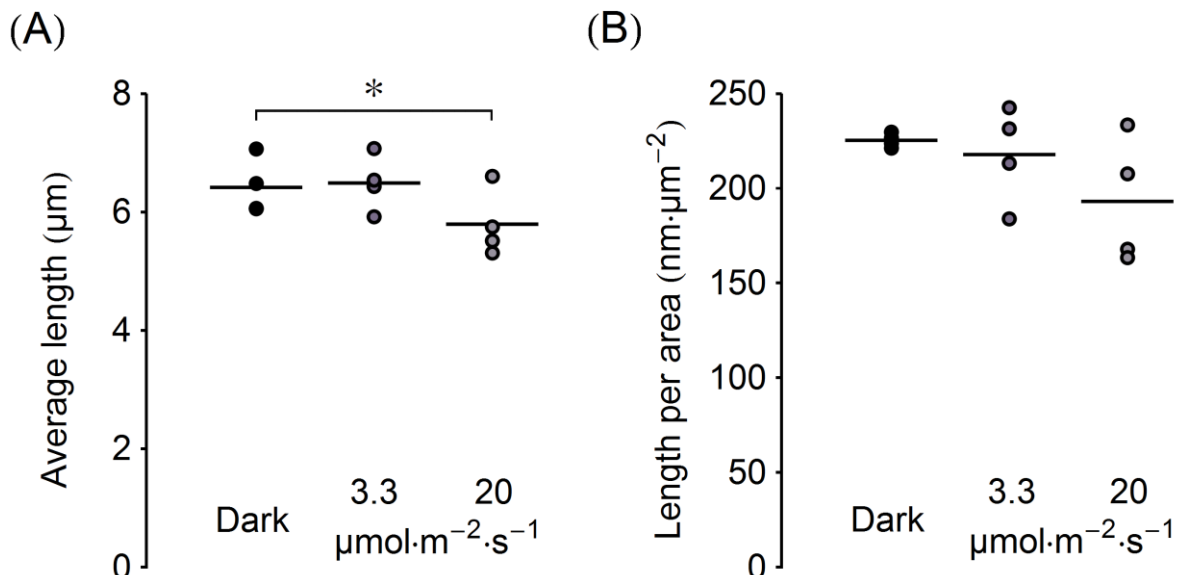

Supplementary Figure 5. Effect of UV-B irradiation on the average length (A) and length per area of the projection image (B) of actin fibers visualized with Lifeact-GFP in pavement cells of *Arabidopsis* leaves shown on Figure 4. Leaves were mock-irradiated or irradiated with UV-B (280 – 320 nm) of 3.3  $\mu\text{mol}\cdot\text{m}^{-2}\cdot\text{s}^{-1}$  or 20  $\mu\text{mol}\cdot\text{m}^{-2}\cdot\text{s}^{-1}$  for 1 h. Maximum intensity projections were calculated from Z-stacks, recorded for 30  $\mu\text{m}$ , starting from the leaf upper surface. Each dot represents the mean value obtained by

quantification of three stacks, recorded on a single leaf. For each treatment, stacks obtained on four leaves were quantified. Horizontal bars represent means of all measurements for a treatment. Asterisks indicate statistically significant differences between means for different treatments (adjusted p values: \* -  $0.01 < p < 0.05$ ).

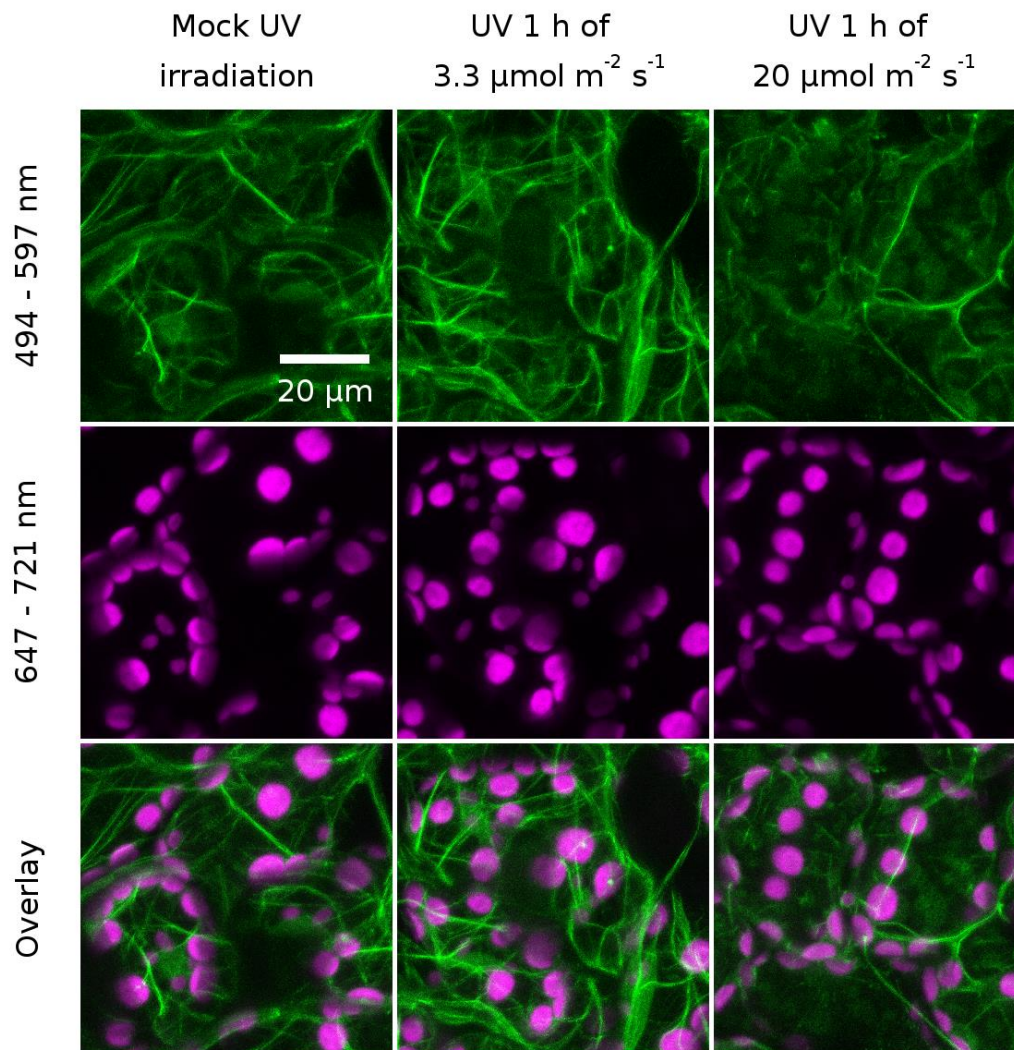

Supplementary Figure 6. Effect of UV-B irradiation on the actin cytoskeleton visualized with Lifeact-GFP in the palisade cells of *Arabidopsis* leaves. Leaves were mock-irradiated or irradiated with UV-B (280 – 320 nm) of  $3.3 \mu\text{mol}\cdot\text{m}^{-2}\cdot\text{s}^{-1}$  or  $20 \mu\text{mol}\cdot\text{m}^{-2}\cdot\text{s}^{-1}$  for 1 h. Palisade cells were then imaged with a confocal microscope through the intact epidermis. The emission was recorded in the 494 – 597 nm range for GFP visualization and in the 647 – 721 nm range to visualize chloroplasts. Maximum intensity projections were calculated from slices of Z-stacks, corresponding to ca. 10  $\mu\text{m}$ , starting from the top of the palisade cells.

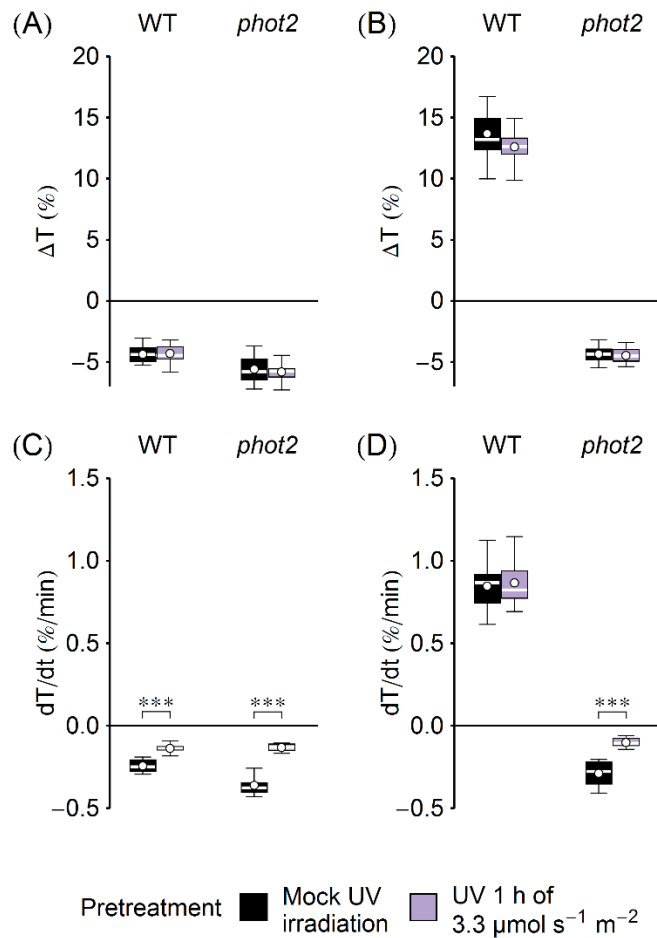

Supplementary Figure 7. (A, B) The total amplitudes  $\Delta T$  of chloroplast responses induced by irradiation with UV-B of  $3.3 \mu\text{mol}\cdot\text{m}^{-2}\cdot\text{s}^{-1}$  for 1 h and subsequent irradiation with blue light of 1.6 (A) or (B)  $120 \mu\text{mol}\cdot\text{m}^{-2}\cdot\text{s}^{-1}$  for 1 h. (C, D) The maximal rates  $dT/dt$  of chloroplast movements induced by blue light of 1.6  $\mu\text{mol}\cdot\text{m}^{-2}\cdot\text{s}^{-1}$  (C) or  $120 \mu\text{mol}\cdot\text{m}^{-2}\cdot\text{s}^{-1}$  (D) in leaves of WT and *phot2* plants pre-treated with UV-B of  $3.3 \mu\text{mol}\cdot\text{m}^{-2}\cdot\text{s}^{-1}$  for 1 h. Each box corresponds to 18 – 20 measurements. Asterisks indicate statistically significant differences between means for leaves pretreated with UVB and the mock-irradiated ones (\*\*\*) - adjusted  $p < 0.001$ .

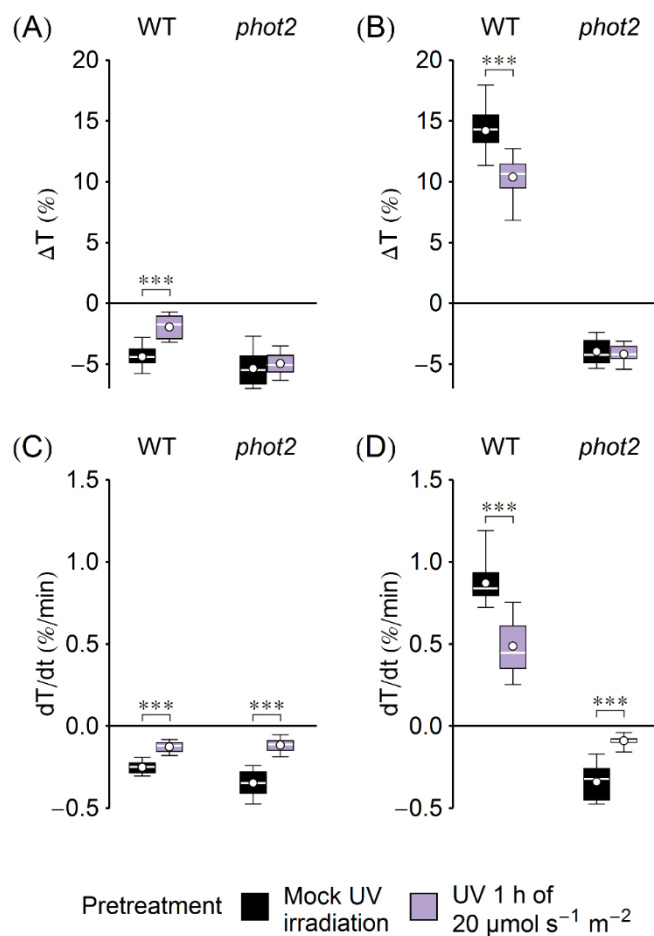

Supplementary Figure 8. The total amplitudes  $\Delta T$  of chloroplast responses induced by irradiation with UV-B of  $20 \mu\text{mol}\cdot\text{m}^{-2}\cdot\text{s}^{-1}$  for 1 h and subsequent irradiation with blue light of 1.6 (A) or (B)  $120 \mu\text{mol}\cdot\text{m}^{-2}\cdot\text{s}^{-1}$  for 50 min. (C, D) The maximal rates  $dT/dt$  of chloroplast movements induced by blue light of  $1.6 \mu\text{mol}\cdot\text{m}^{-2}\cdot\text{s}^{-1}$  (C) or  $120 \mu\text{mol}\cdot\text{m}^{-2}\cdot\text{s}^{-1}$  (D) in leaves of WT and *phot2* plants pre-treated with UV-B of  $20 \mu\text{mol}\cdot\text{m}^{-2}\cdot\text{s}^{-1}$  for 1 h. Each box corresponds to 14 measurements. Asterisks indicate statistically significant differences between means for leaves pretreated with UVB and the mock-irradiated ones (\*\*\*) - adjusted  $p < 0.001$ ).
